# Supplementary material
Source: HighWire-hosted journal article supplement (https://ijgc.bmj.com/highwire/filestream/16931/field_highwire_adjunct_files/2/ijgc-2020-001964supp003_data_supplement.pdf)

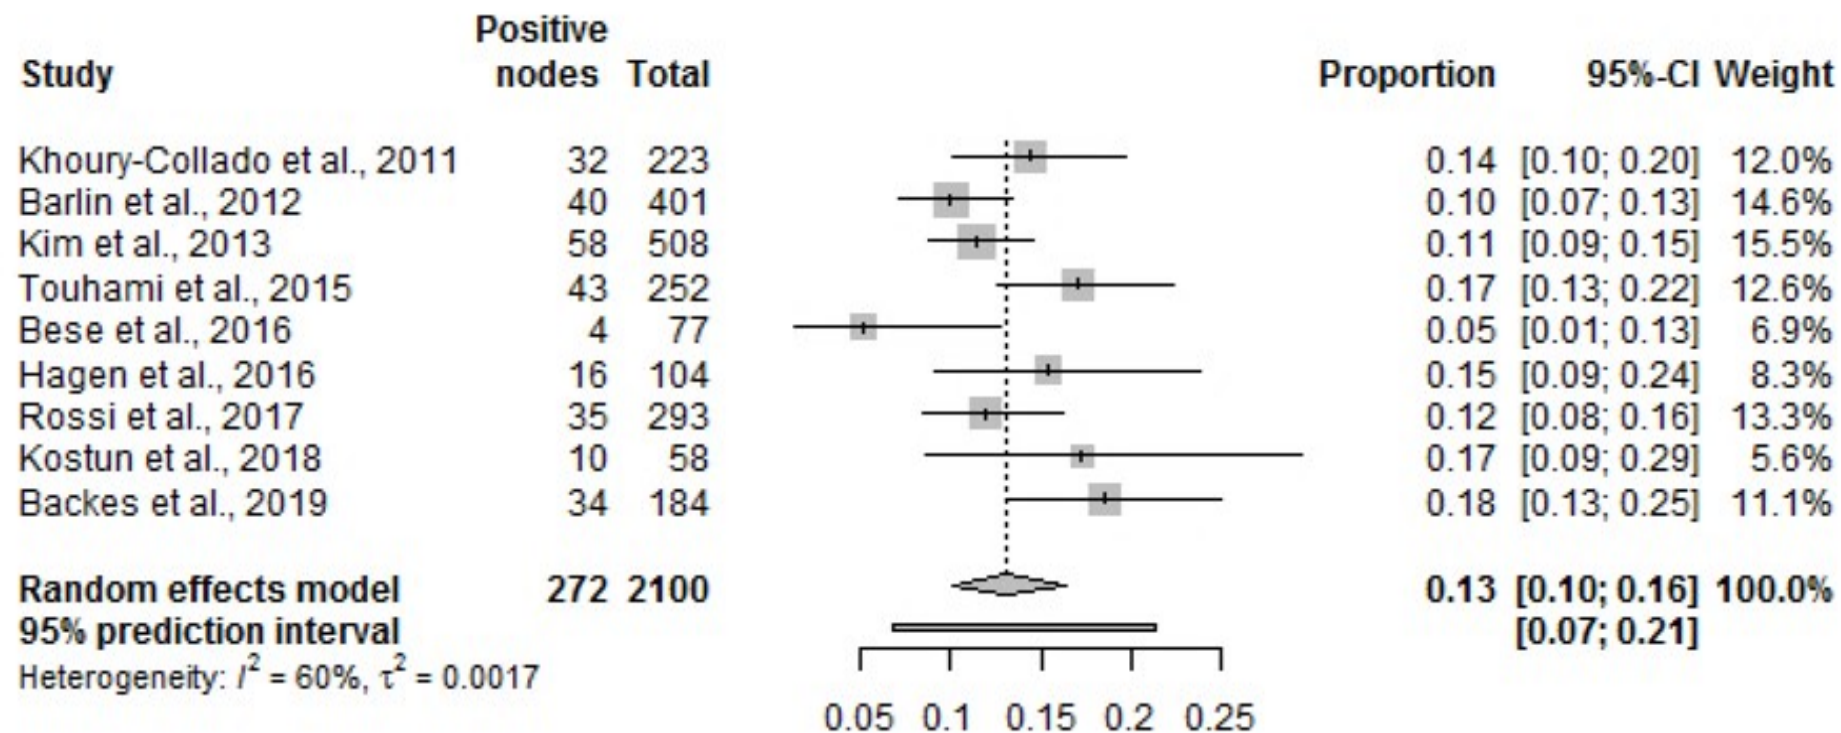

Supplement: ijgc-2020-001964supp003_data_supplement.pdf [file ijgc-2020-001964supp003_data_supplement.pdf]
